# Supplementary material for: Quinoline-based molecular clips for selective fluorescent detection of Zn2+
Source: Royal Society of Chemistry journal article supplement (doi:10.1039/b605653a), 2006-01-01
Supplement: b605653a.pdf [file b605653a.pdf]

## *Electronic Supporting information*

### **Novel Selective Quinoline-based Fluorescent Probes for Zn<sup>2+</sup>**

Da-Yu Wu, Li-Xia Xie, Chang-Li Zhang, Chun-Ying Duan\*, Yong-Gang Zhao, and Zi-Jian Guo\*

Coordination Chemistry Institute, State Key Laboratory of Coordination Chemistry,  
Nanjing University, Nanjing 210093, China, duancy@nju.edu.cn

#### **Index**

**Figure S1.** Fluorescence emission spectra at 293 K in DMSO-H<sub>2</sub>O (80:20), conducting the free sensor QB1-2, and their respective zinc complexes.

**Figure S2.** Luminescent titrations of receptor QB1 and QB2 with increasing concentration of Zn<sup>2+</sup>.

**Figure S3.** Job plot showing fluorescent intensity changes at 495 nm with increasing concentration of Zn<sup>2+</sup> and Benesi-Hildebrand plot for QB1-Zn<sup>2+</sup> system.

**Figure S4.** Job plot showing fluorescent intensity changes at 495 nm with increasing concentration of Zn<sup>2+</sup> and Benesi-Hildebrand plot for QB2-Zn<sup>2+</sup> system.

**Figure S5.** Selectivity of QB1 and QB2 for Zn<sup>2+</sup> over the metal ions of interest.

**Figure S6.** The dependence of intensity in the emission spectra upon different pH.

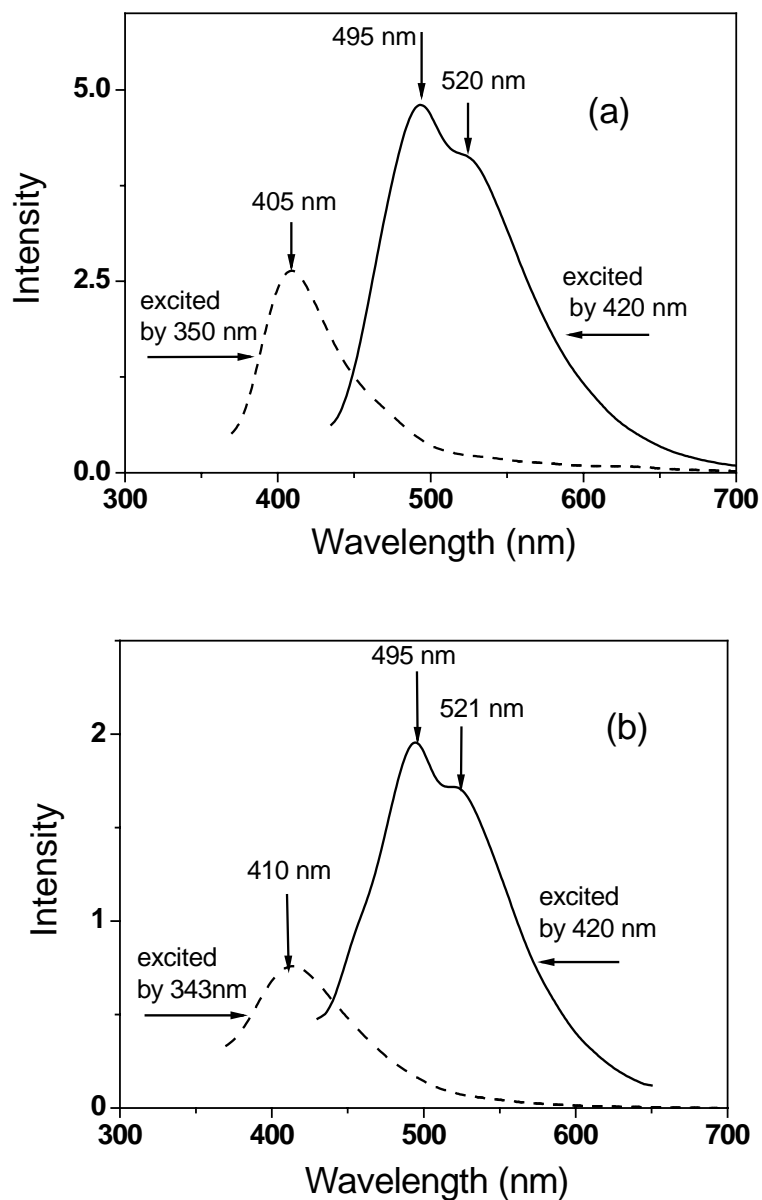

**Figure S1.** Fluorescence emission spectra at 293 K in DMSO-H<sub>2</sub>O (80:20) (a) QB1 ( $1.0 \times 10^{-4}$  mol/L) only and zinc perchlorate ( $2.0 \times 10^{-3}$  mol/L) was added, respectively. (b) QB2 ( $1.0 \times 10^{-5}$  mol/L) only and zinc perchlorate ( $1.5 \times 10^{-4}$  mol/L) was added, respectively. The dashed line corresponds to the free chemosensors only and the solid line to the zinc complexes.

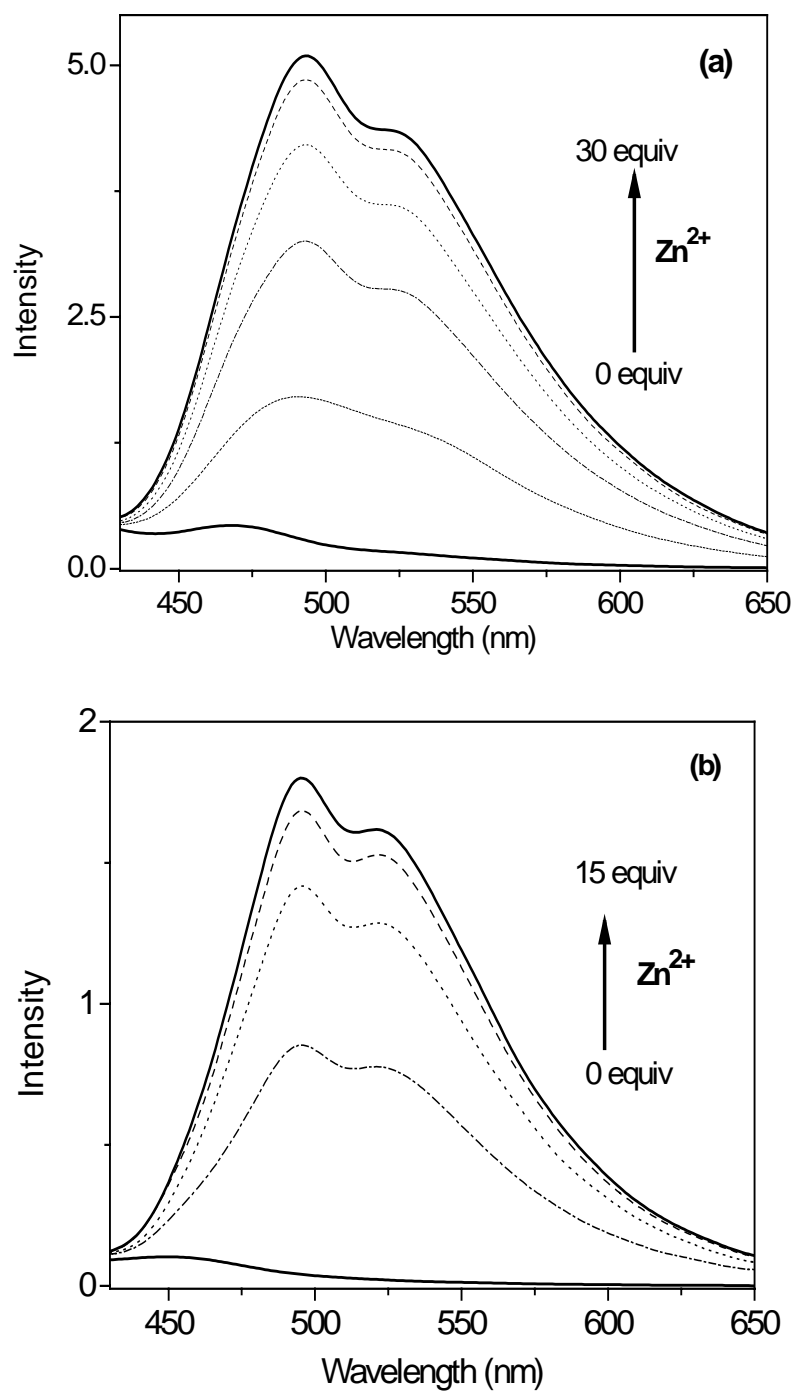

**Figure S2.** Luminescent titrations of receptors QB1 at  $1.0 \times 10^{-4}$  mol/L (a) and QB2 at  $1.0 \times 10^{-5}$  mol/L (b) with increasing concentration of  $\text{Zn}^{2+}$ . Excitation wavelength was 420 nm with 4 nm slit widths, and spectra were corrected.

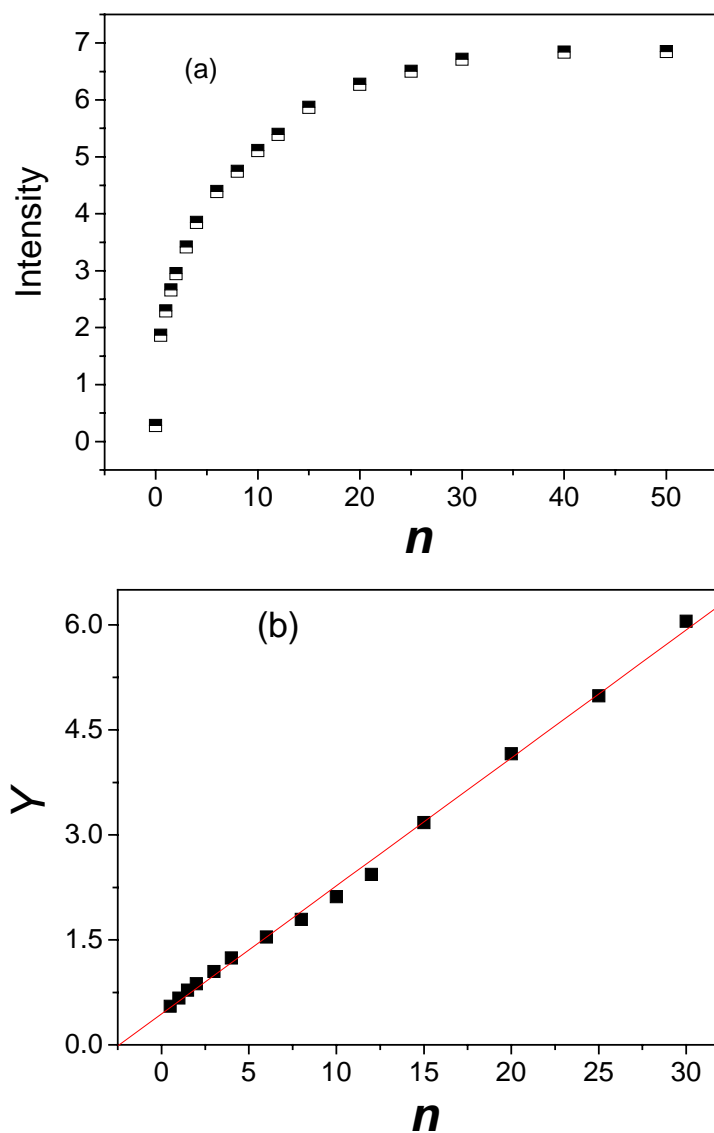

**Figure S3.** (a) Fluorescent intensity changes at 495 nm vs the equivalent molar ratio of  $\text{Zn}^{2+}$  added (Excitation wavelength at 420 nm with the concentration of QB1 being  $1.0 \times 10^{-4} \text{M}$ ). (b) Plot for QB1- $\text{Zn}^{2+}$  system with  $K_{\text{ass}}$  being calculated as  $4.08 \times 10^9 \text{M}^{-3}$ .

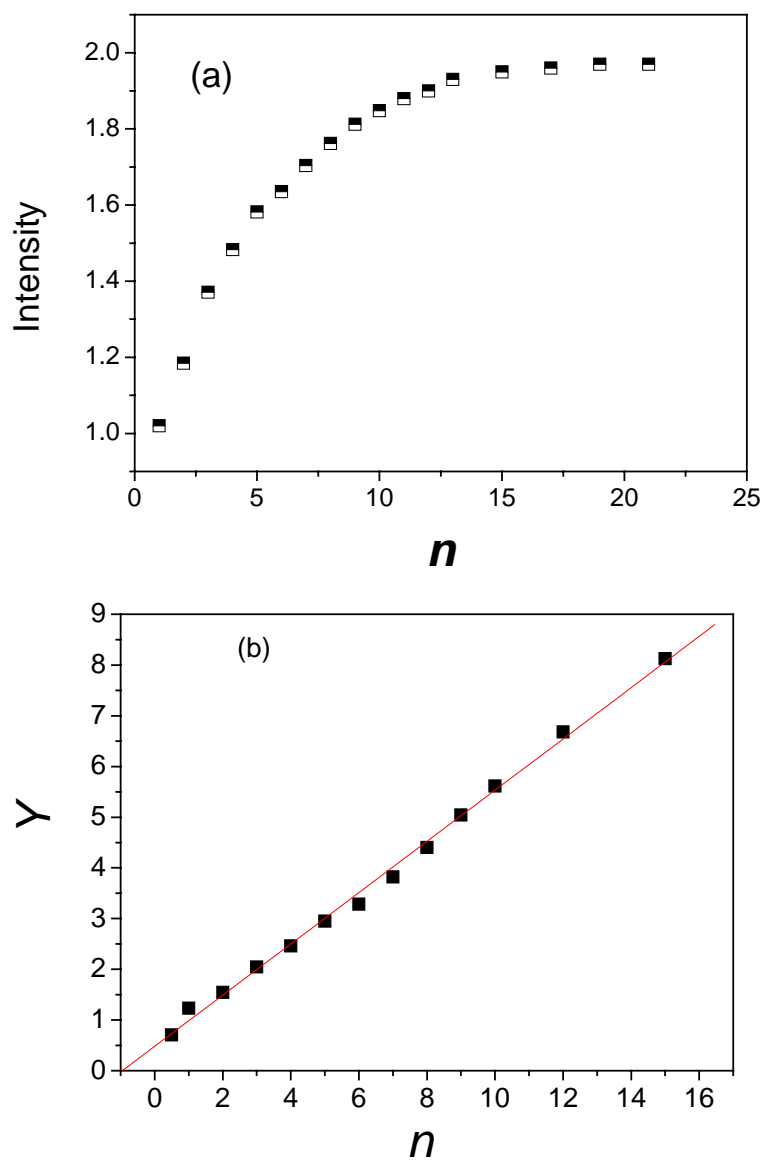

**Figure S4.** (a) Fluorescent intensity changes at 495 nm vs the equivalent molar ratio of  $\text{Zn}^{2+}$  added (Excitation wavelength at 420 nm with the concentration of QB2 being  $1.0 \times 10^{-5} \text{ M}$ ). (b) Plot for QB2- $\text{Zn}^{2+}$  system with  $K_{\text{ass}}$  being calculated as  $1.27 \times 10^{14} \text{ M}^{-3}$ .

Here, the linear fits for  $K_s$  of Zn-QB1 and Zn-QB2 are deduced as follows:

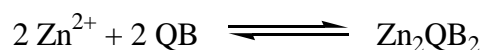

ligand only

$$C_0$$

$nC_0 \text{Zn}^{2+}$  is added

$$(n-x) C_0$$

$$(1-x) C_0$$

$$xC_0/2$$

$$K_{ass} = \frac{[\text{Zn}_2\text{QB}_2]}{[\text{Zn}^{2+}]^2 [\text{QB}]^2} \quad (1)$$

The measurements are performed under the conditions where the fluorescent intensities of the free ligand is a constant  $A_0$ ; After addition of a given amount of metal salt at a concentration of  $C_0$ , the fluorescent intensity becomes

$$A = a \times [C_0x/2] + A_0 \quad (2)$$

In the presence of an excess of salt, the fluorescent intensity reaches the saturate value  $A_{lim}$ :

$$A_{lim} = a \times [C_0/2] + A_0 \quad (3)$$

From eqs (2) and (3), it is easy to derive the usual equation:

$$\frac{A - A_0}{A_{lim} - A_0} = x \quad (4)$$

From eqs (1) to (4), we can obtain the equation:

$$(2nC_0^3)^{1/2} \times \left( n - \frac{A - A_0}{A_{lim} - A_0} \right) = \frac{1}{A_{lim} - A} \times [(A - A_0) \times (A_{lim} - A_0)]^{1/2} \quad (5)$$

For clarity, we set the value,

$$\frac{1}{A_{lim} - A} \times [(A - A_0) \times (A_{lim} - A_0)]^{1/2} = Y \quad (6)$$

If  $A_{lim}$  cannot be accurately determined, it can be left as a floating parameter in the analysis.  $k$  can thus be obtained by a linear least-squares analysis of  $n$  versus  $Y$ .

For chemosensor QB1,  $K_{ass}$  is calculated to be  $4.08 \times 10^9 \text{ (mol/L)}^{-3}$ .

For chemosensor QB2,  $K_{ass}$  is calculated to be  $1.27 \times 10^{14} \text{ (mol/L)}^{-3}$ .

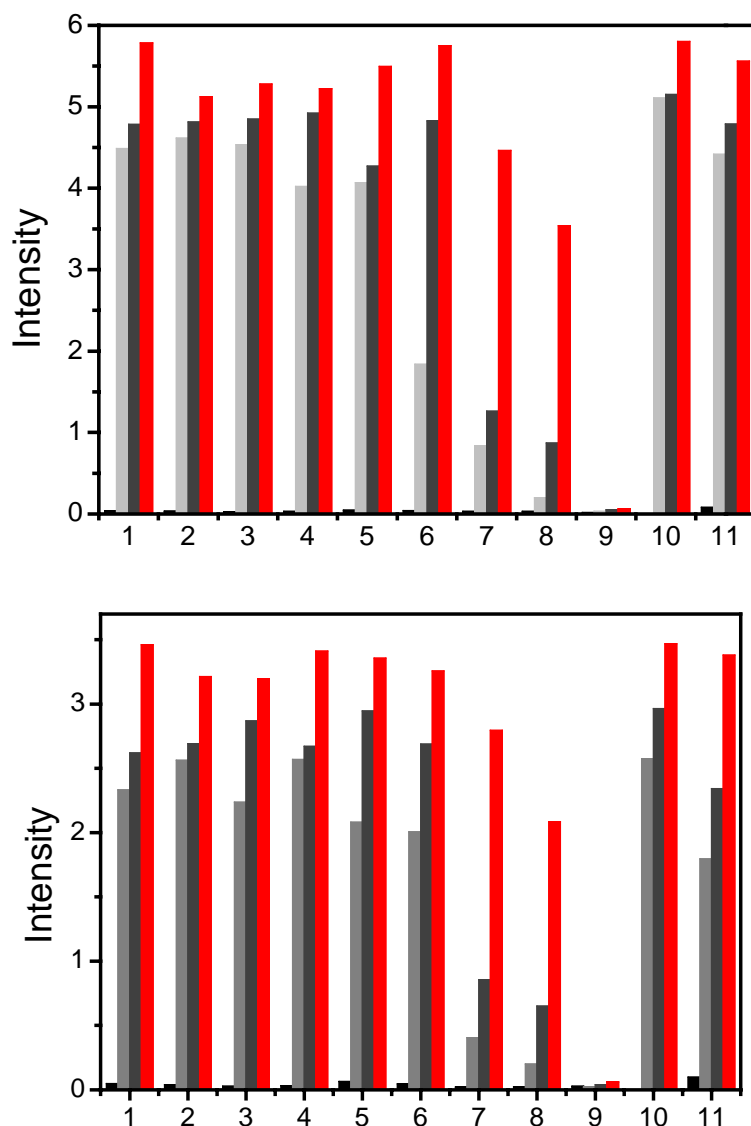

**Figure S5.** Selectivity of QB2 for Zn<sup>2+</sup> over the metal ions of interest. Black bars: QB2 + 15 equiv cation of interest: 1, Na<sup>+</sup>; 2, K<sup>+</sup>; 3, Ca<sup>2+</sup>; 4, Mg<sup>2+</sup>; 5, Mn<sup>2+</sup>; 6, Fe<sup>2+</sup>; 7, Co<sup>2+</sup>; 8, Ni<sup>2+</sup>; 9, Cu<sup>2+</sup>; 10, Zn<sup>2+</sup>(0 equiv); 11, Cd<sup>2+</sup>.. Light gray bars: addition of 1 equiv of Zn(II) to the solution containing QB2 and 5 equiv cation of interest. Dark gray bars: addition of 1 equiv of Zn(II) to the solution containing QB2 and 1 equiv cation of interest. Red bars: addition of 10 equiv of Zn(II) to the solution containing QB2 and 1 equiv cation of interest. Samples were excited at 420 nm, and the emission spectra were recorded. [QB] = 100  $\mu$ M.

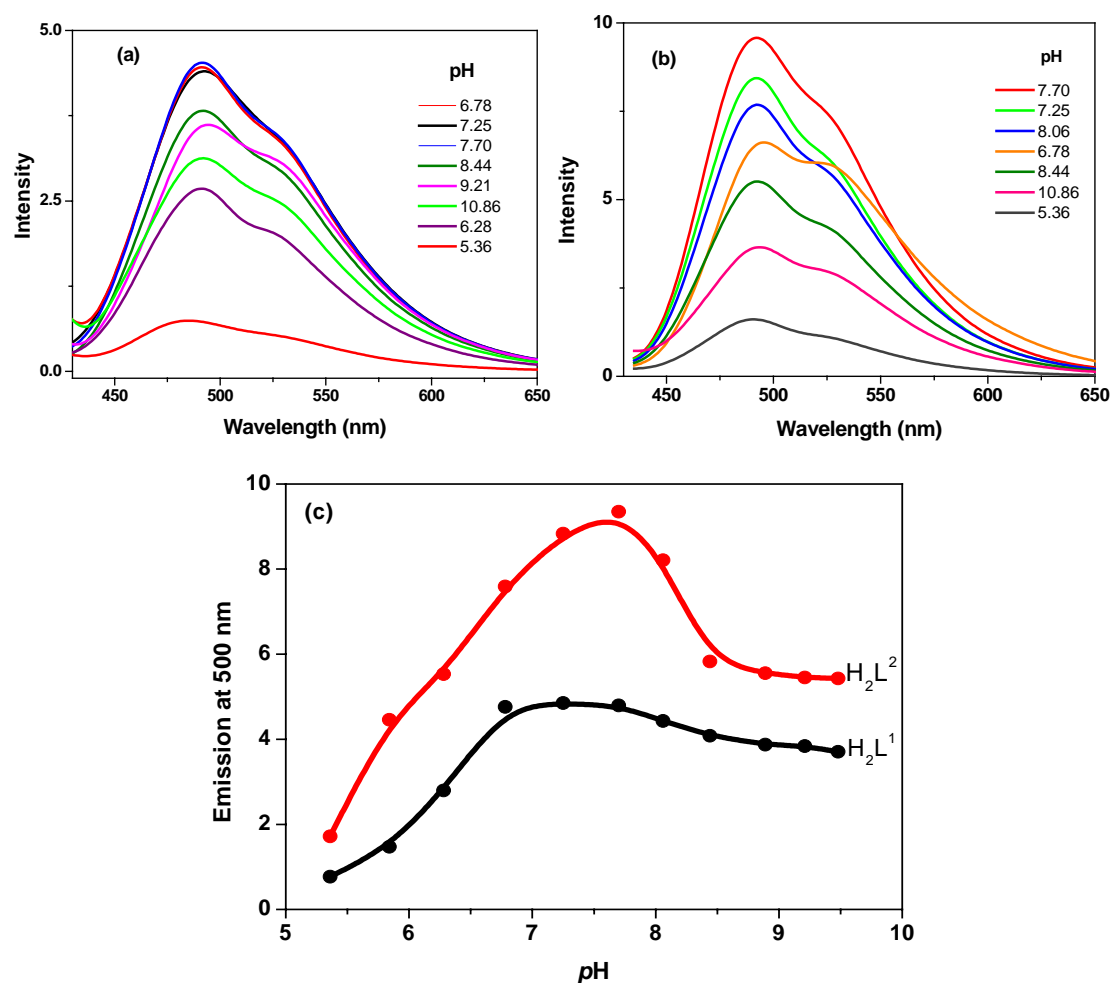

**Figure S6.** Changes in the emission spectra of (a) QB1 (50 μM) (b) QB2 (50 μM) against different pH (HEPES buffer or TRIS buffer) in DMSO – H<sub>2</sub>O (v:v, 40:60) solutions upon addition of Zn(ClO<sub>4</sub>)<sub>2</sub> · 6 H<sub>2</sub>O (0.75 mM) in water. (c) Emission intensity variations of QB with different pH after addition of Zn<sup>2+</sup>, monitored at 420 nm.
